# Supplementary material for: A polygenic risk score identifies undiagnosed cases of diabetes
Source: bioRxiv or medRxiv preprint supplement (doi:10.1101/2023.10.31.23297847), 2023-10-31
Supplement: Supplementary file [file media-1.pdf]

## Supplementary materials

### A polygenic risk score identifies undiagnosed cases of diabetes

Chris German, PhD<sup>1</sup>; James Ashenurst, PhD<sup>1</sup>; Wei Wang, PhD<sup>1</sup>; 23andMe Research Team<sup>1</sup>;  
Julie M. Granka, PhD<sup>1</sup>; Bertram L. Koelsch, PhD<sup>1</sup>; Noura S. Abul-Husn, MD PhD<sup>1</sup>; Stella  
Aslibekyan, PhD<sup>1</sup>; Adam Auton, PhD<sup>1</sup>; Joyce Tung, PhD<sup>1</sup>; Suyash S. Shringarpure, PhD<sup>1</sup>;  
Michael V. Holmes, MD PhD<sup>1</sup>

#### Author Affiliations:

1. 23andMe, Sunnyvale, CA, USA

#### Correspondence to:

Chris German, PhD ([chrisg@23andme.com](mailto:chrisg@23andme.com))

Michael V Holmes, MD PhD ([michaelhol@23andme.com](mailto:michaelhol@23andme.com))

## Supplementary Figures and Tables

**Figure S1. Undiagnosed and diagnosed diabetes by strata of T2D PRS: (A) absolute counts; (B) as a proportion to total diabetes cases**

A:

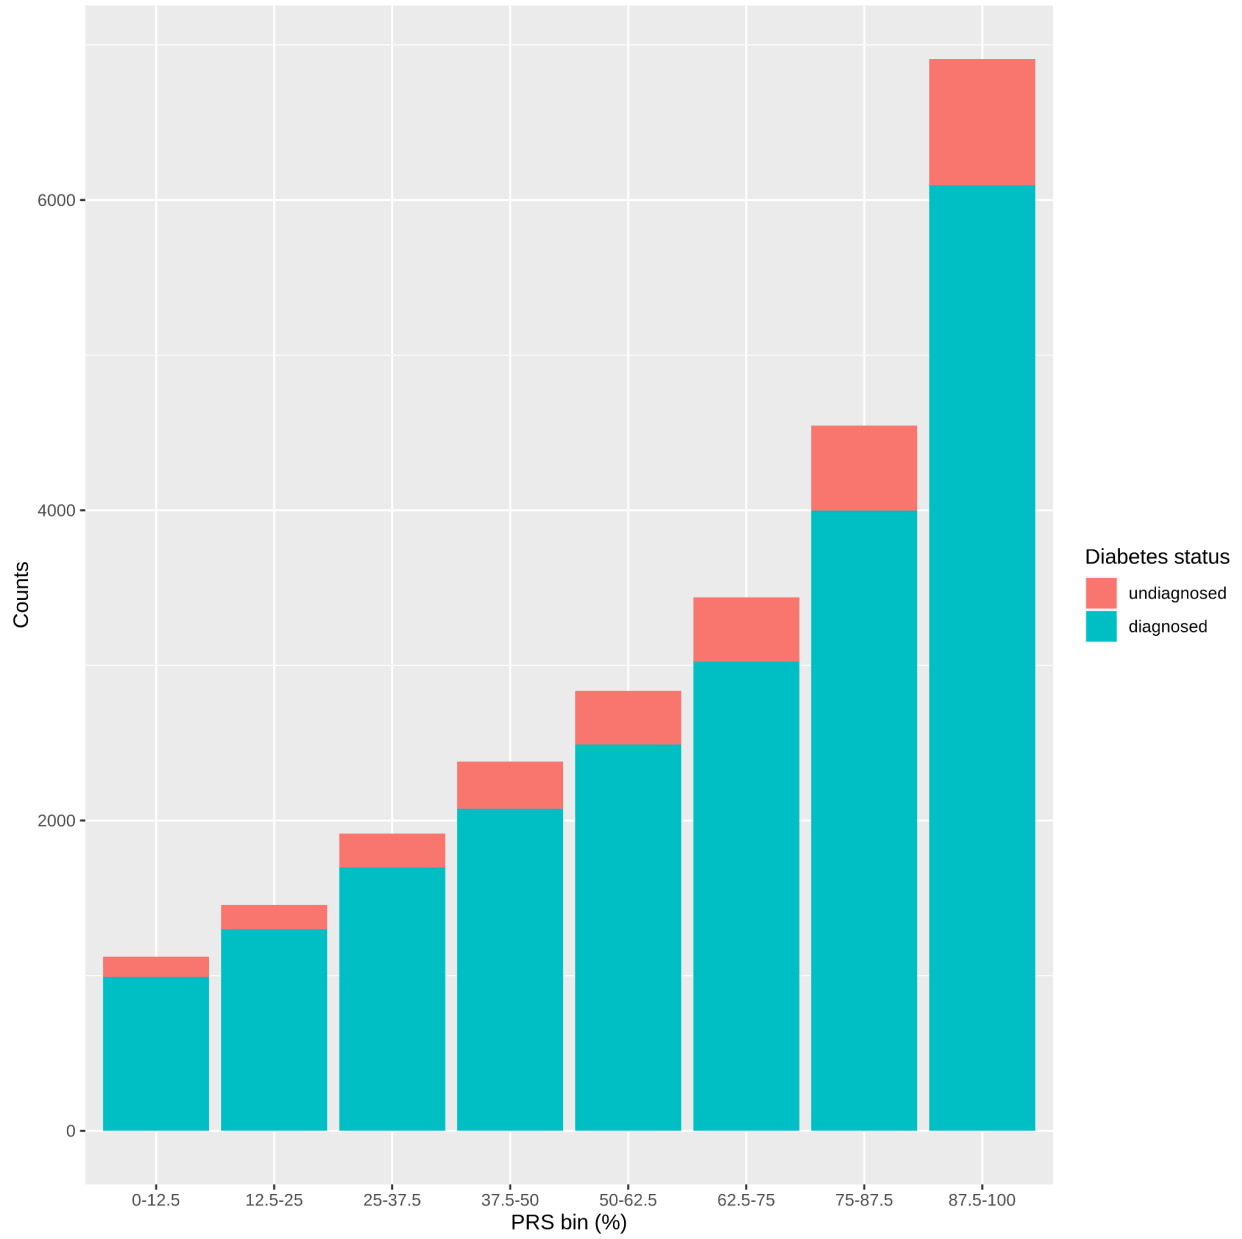

B:

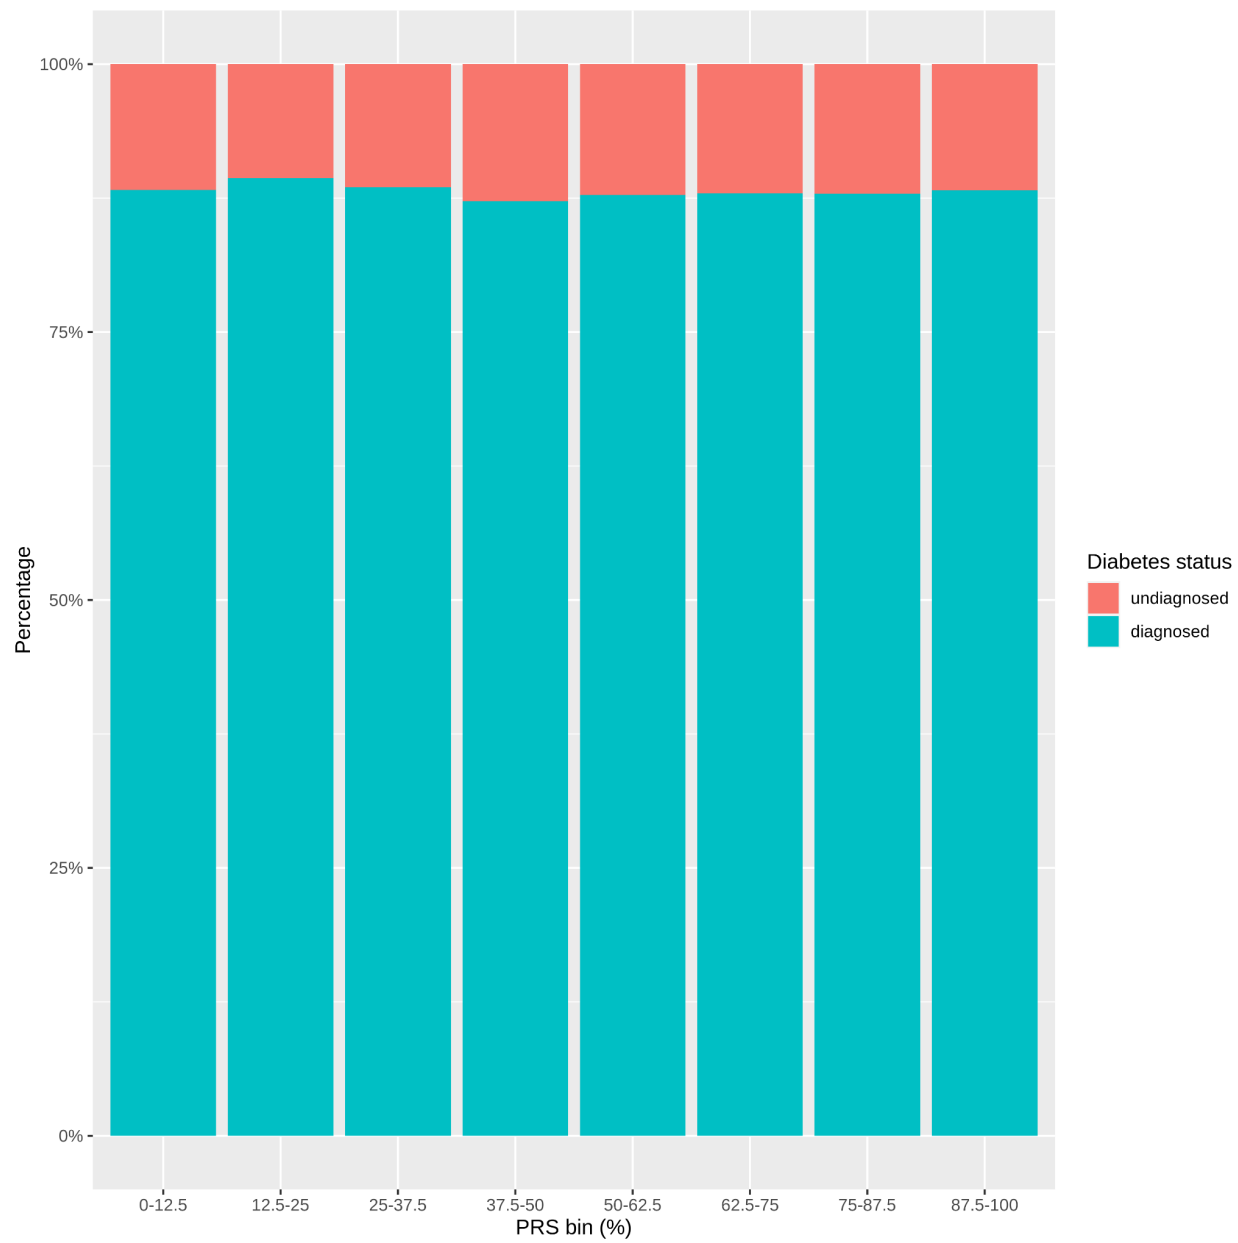

**Figure S2. Undiagnosed and diagnosed diabetes by strata of measured BMI: (A) absolute counts; (B) as a proportion to total diabetes cases**

A:

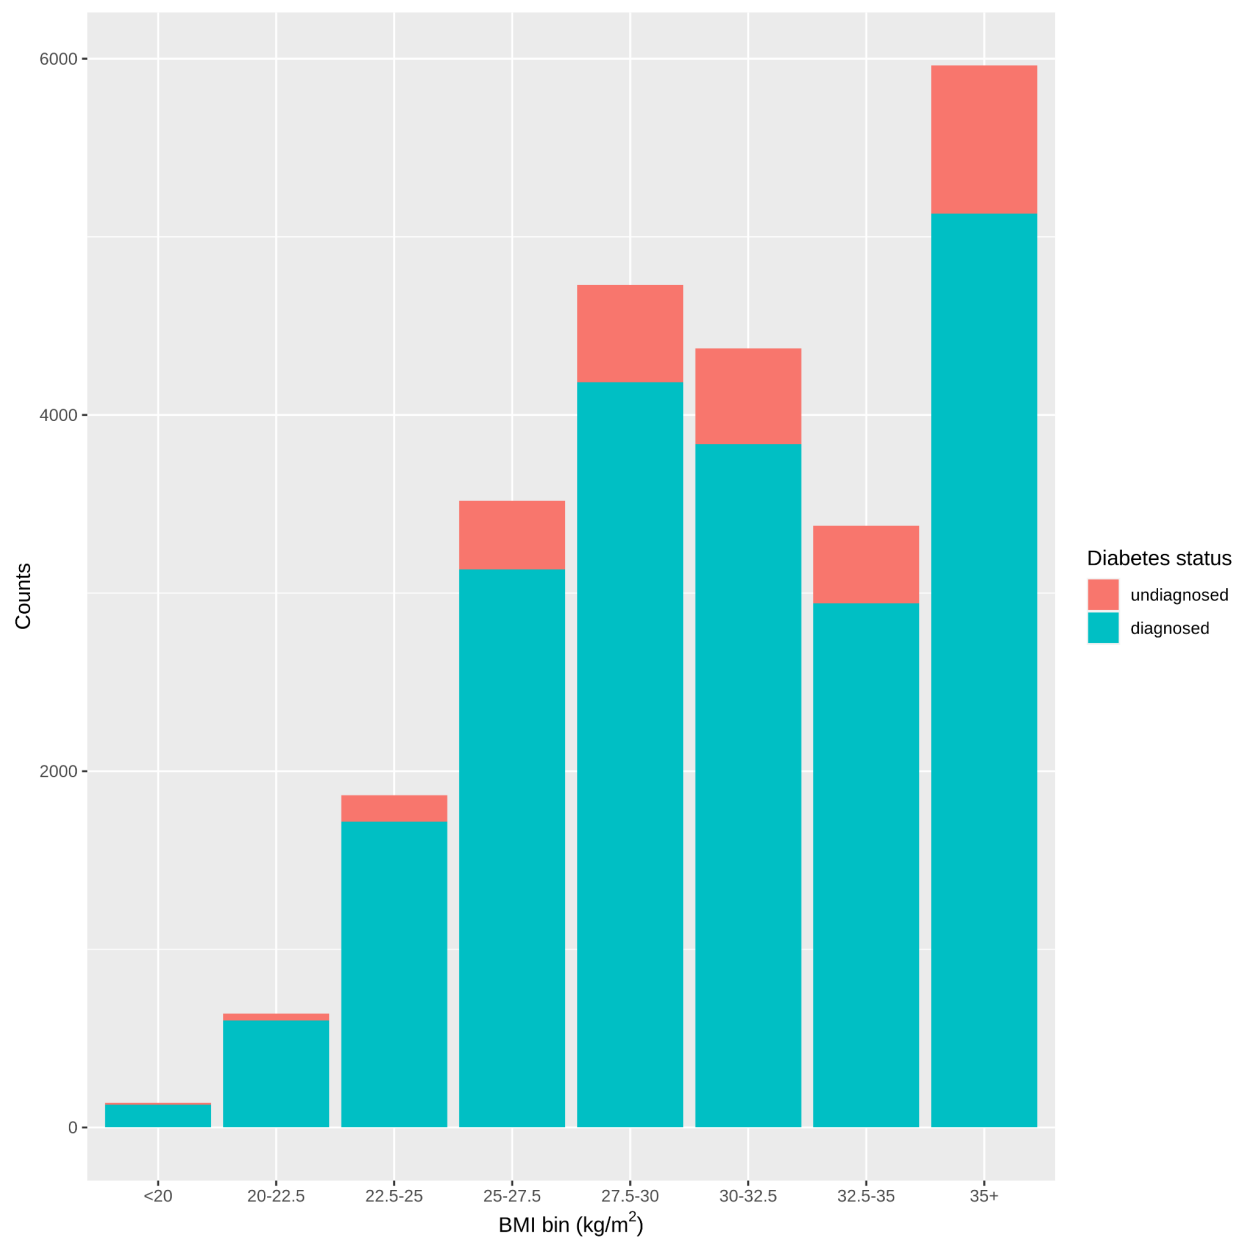

B:

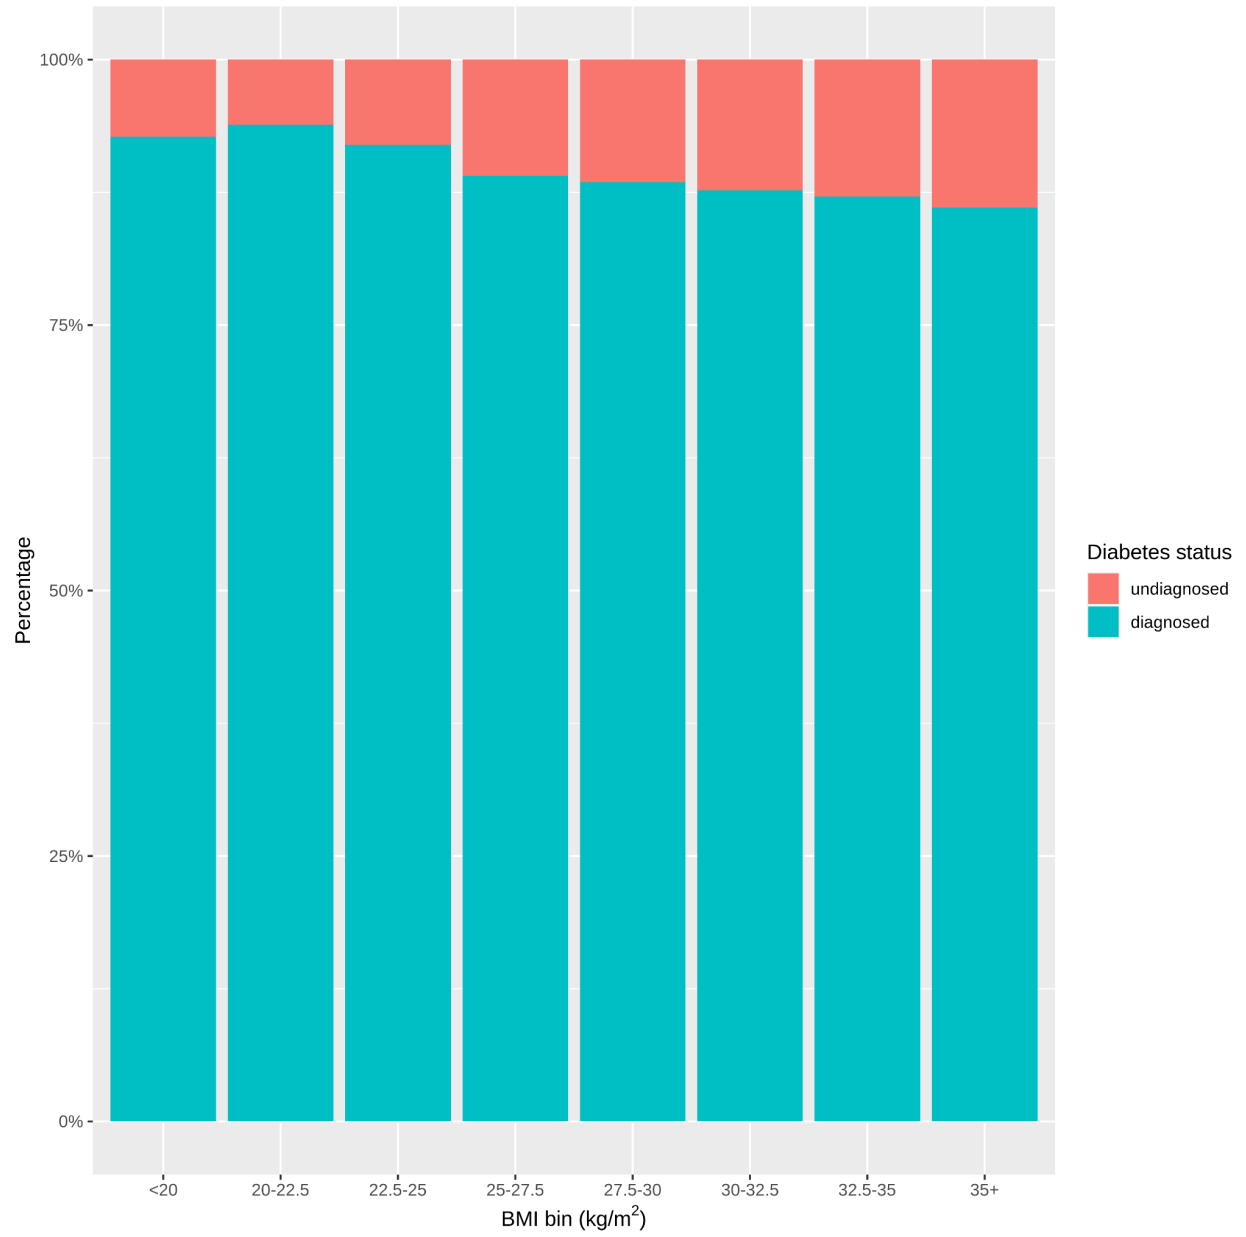

**Figure S3. 2D bar chart plot of undiagnosed diabetes by T2D PRS and BMI. Error bars relate to 95% confidence intervals.**

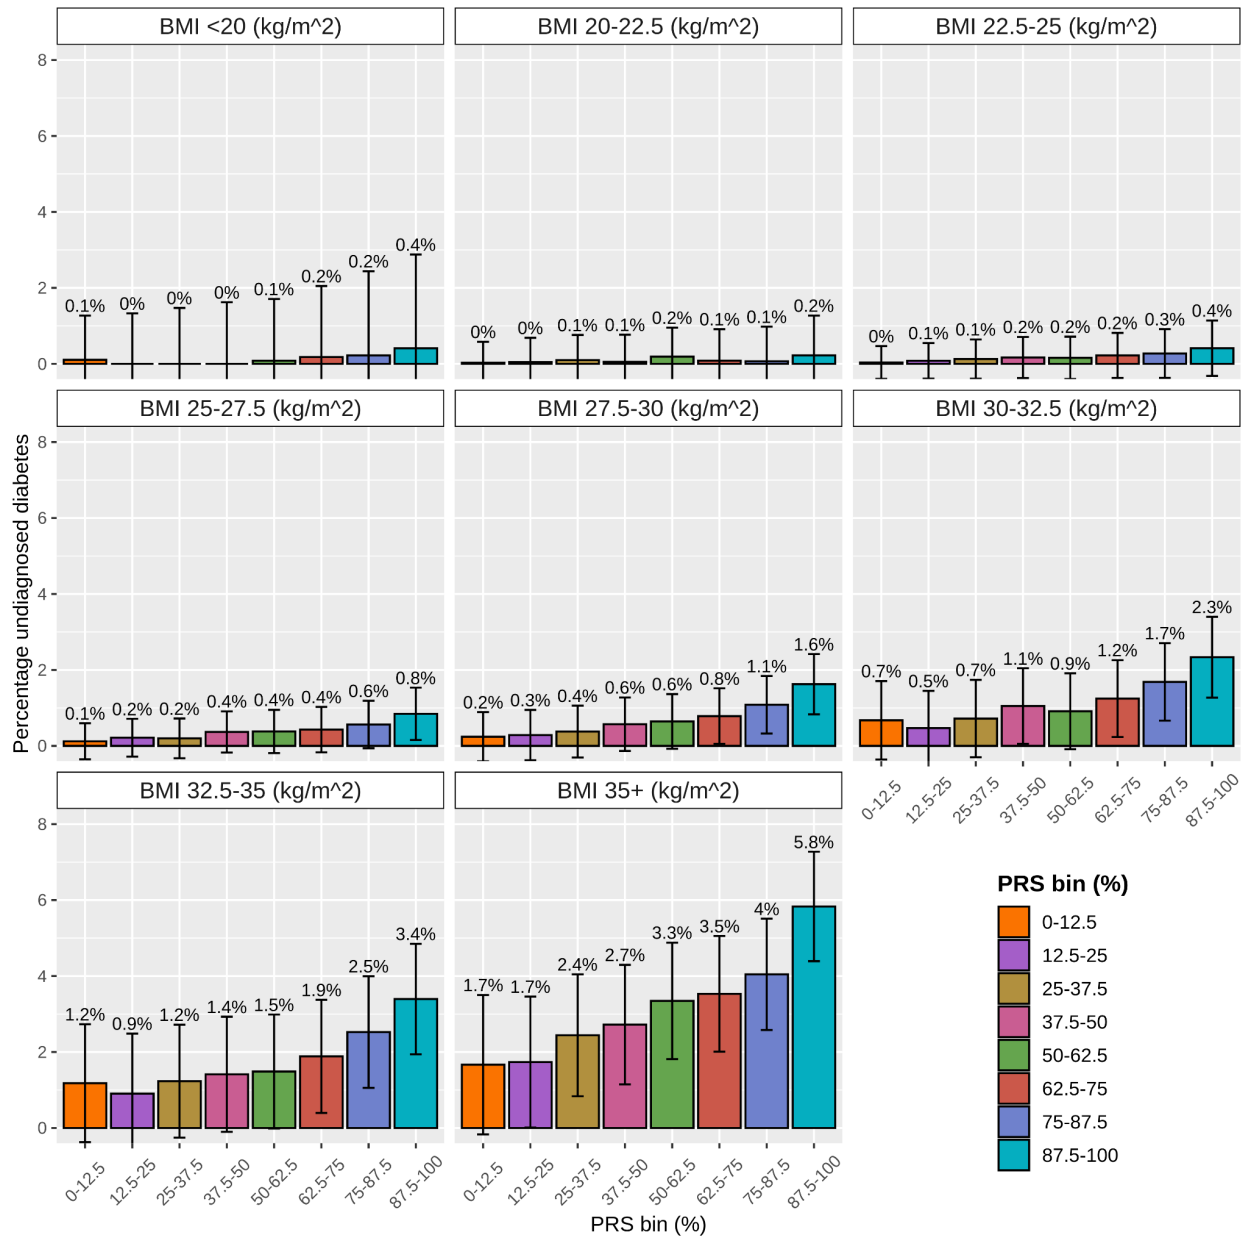

**Figure S4. Proportion of undiagnosed diabetes cases detected by a T2D PRS and BMI, displayed by a heatmap plot.**

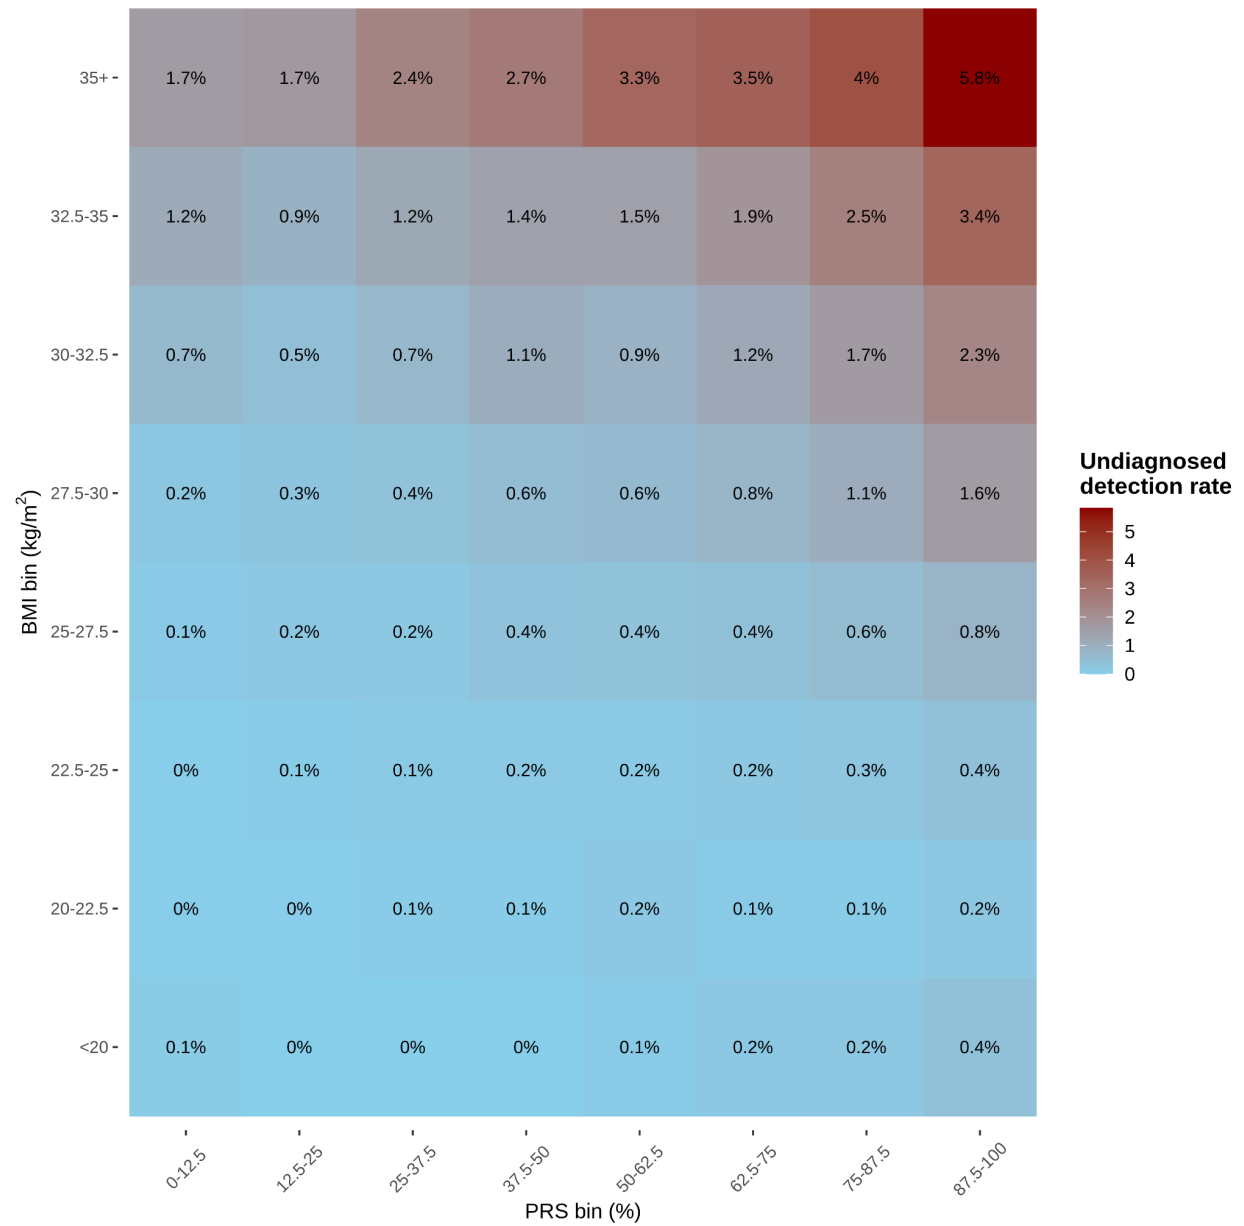

**Figure S5. Proportion of prediabetes cases detected by a T2D PRS and BMI, displayed by a heatmap plot.**

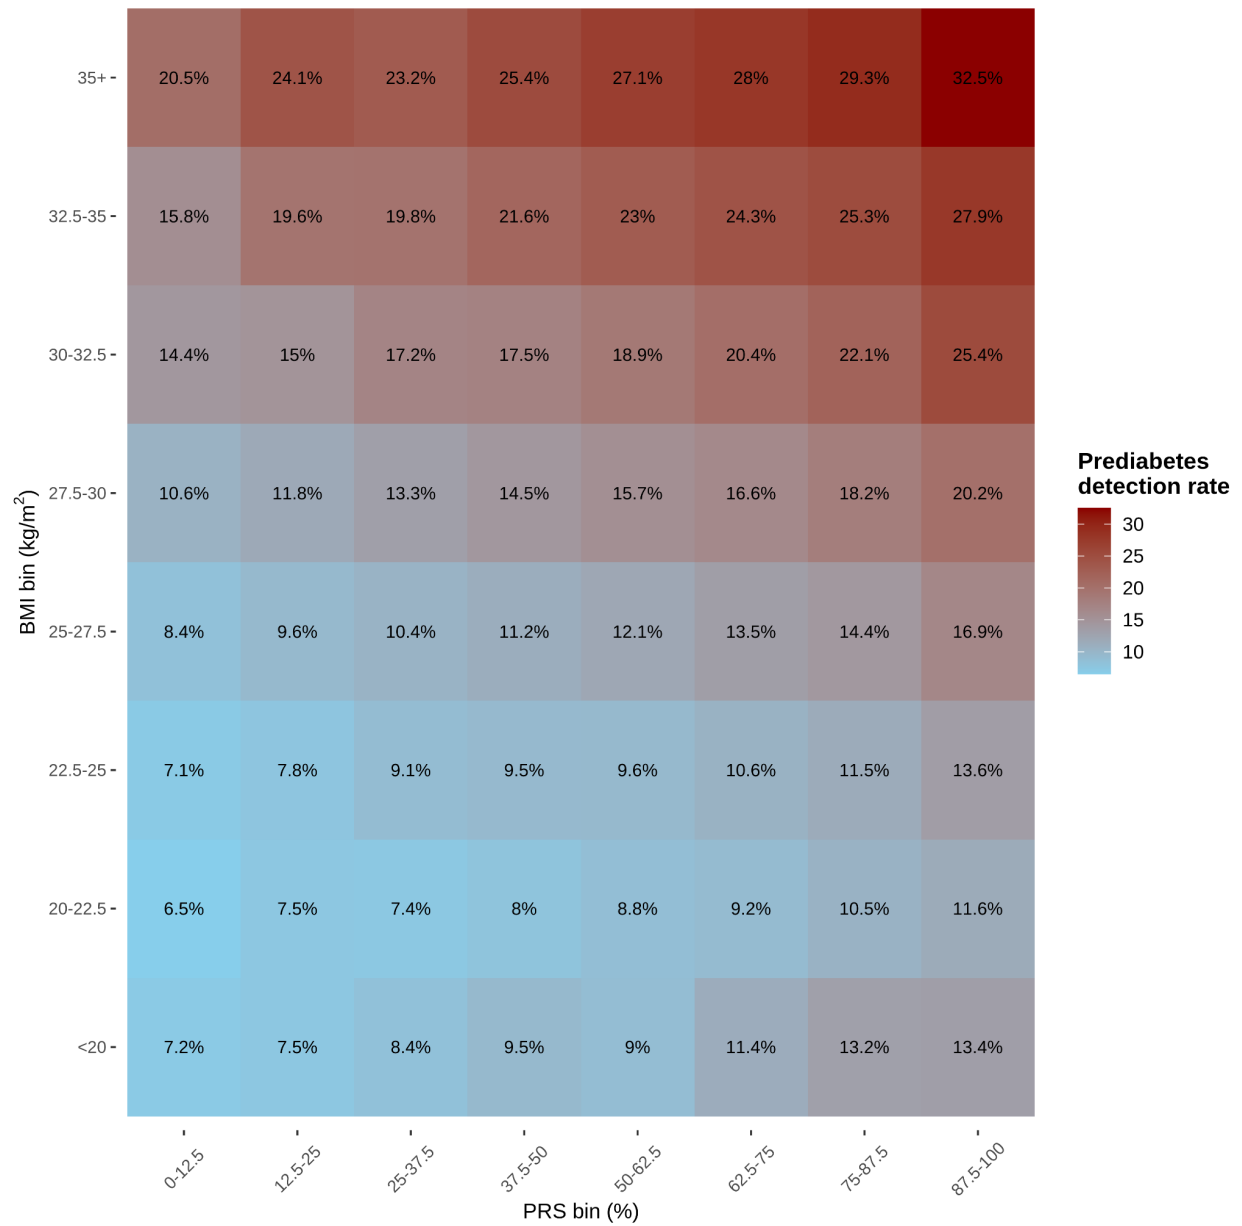



**Figure S6. Probability of undiagnosed diabetes by strata of T2D PRS, stratified by (A) sex and (B) age.**

**A:**

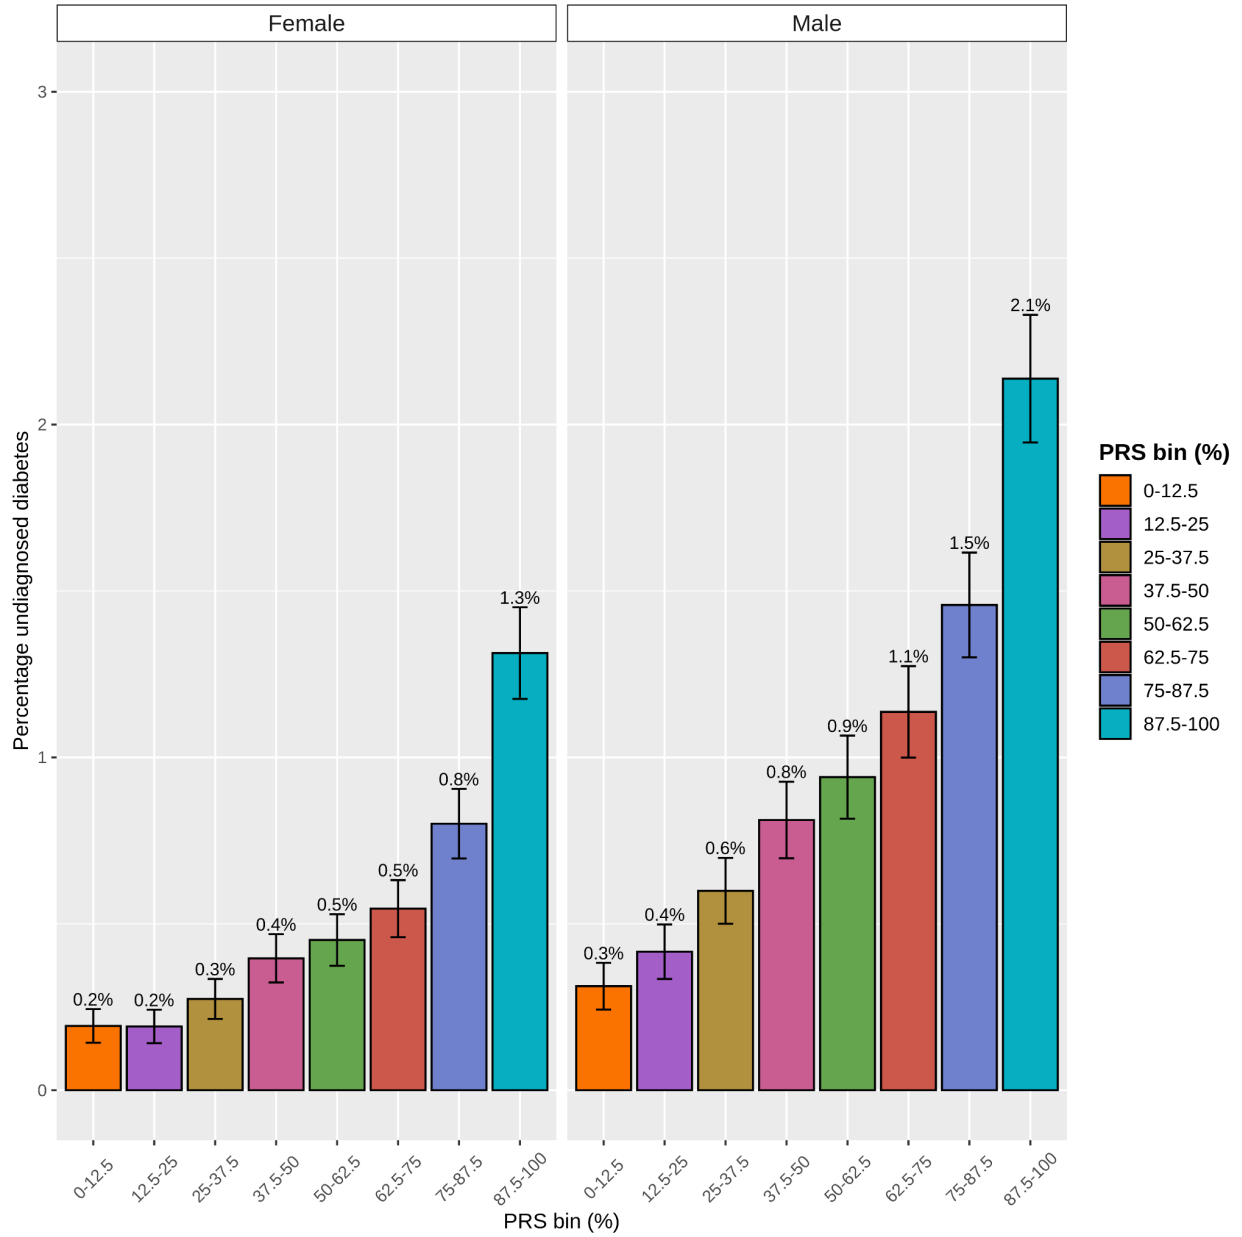

**B:**

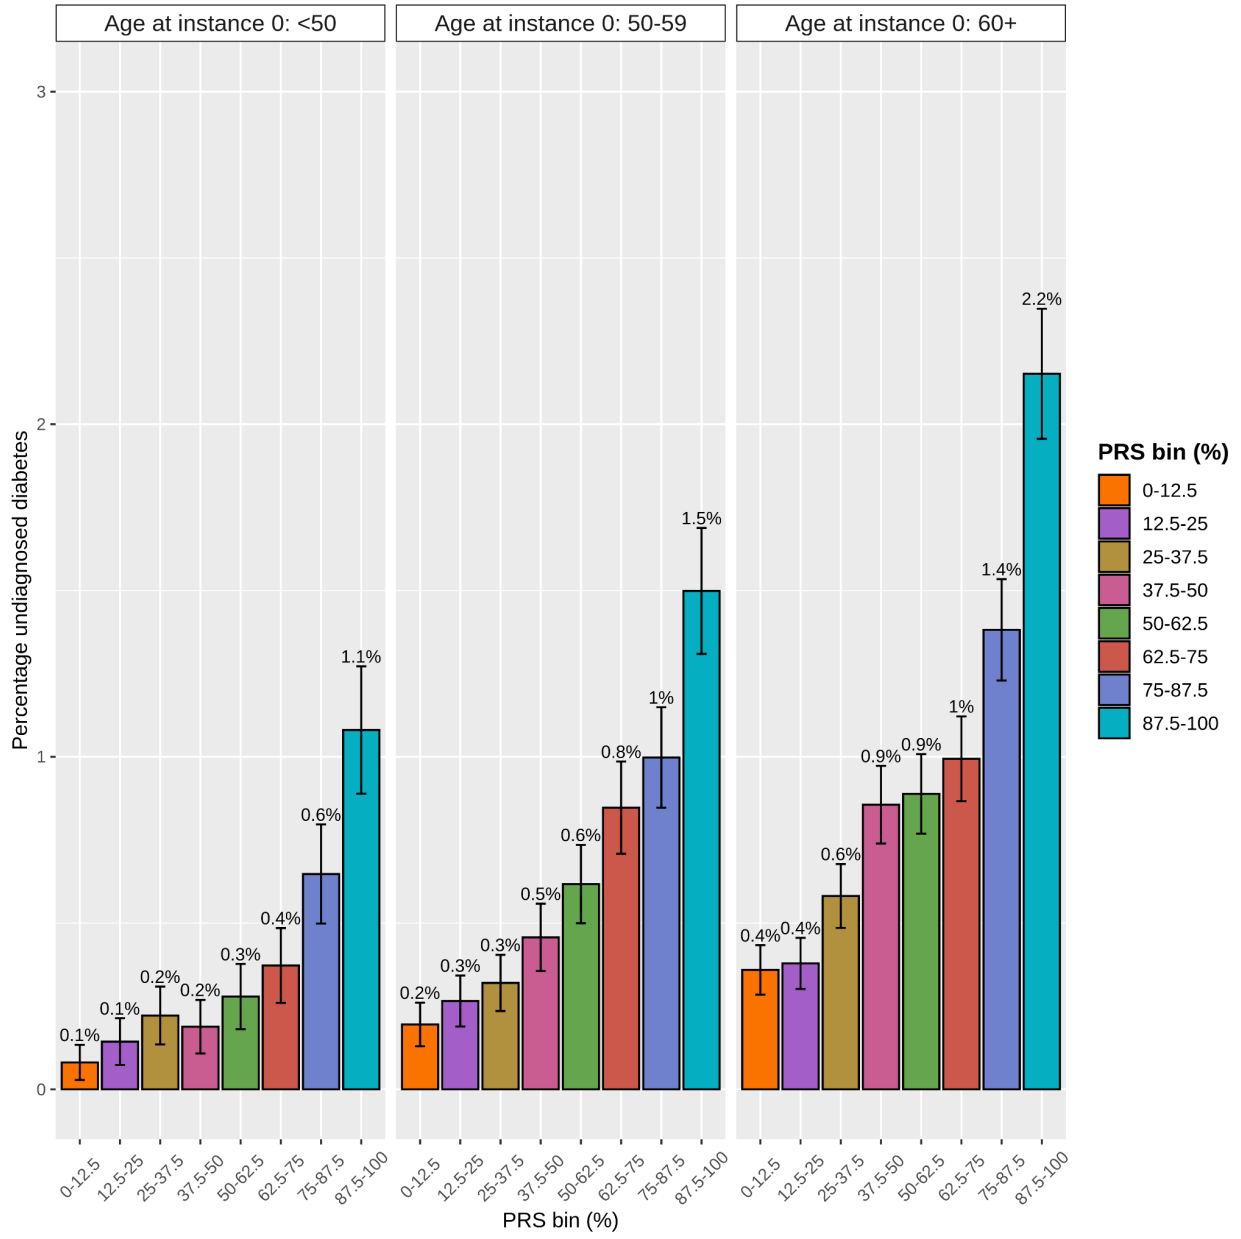

Figure S7. Density plot of T2D PRS values in the UK Biobank by diabetes status.

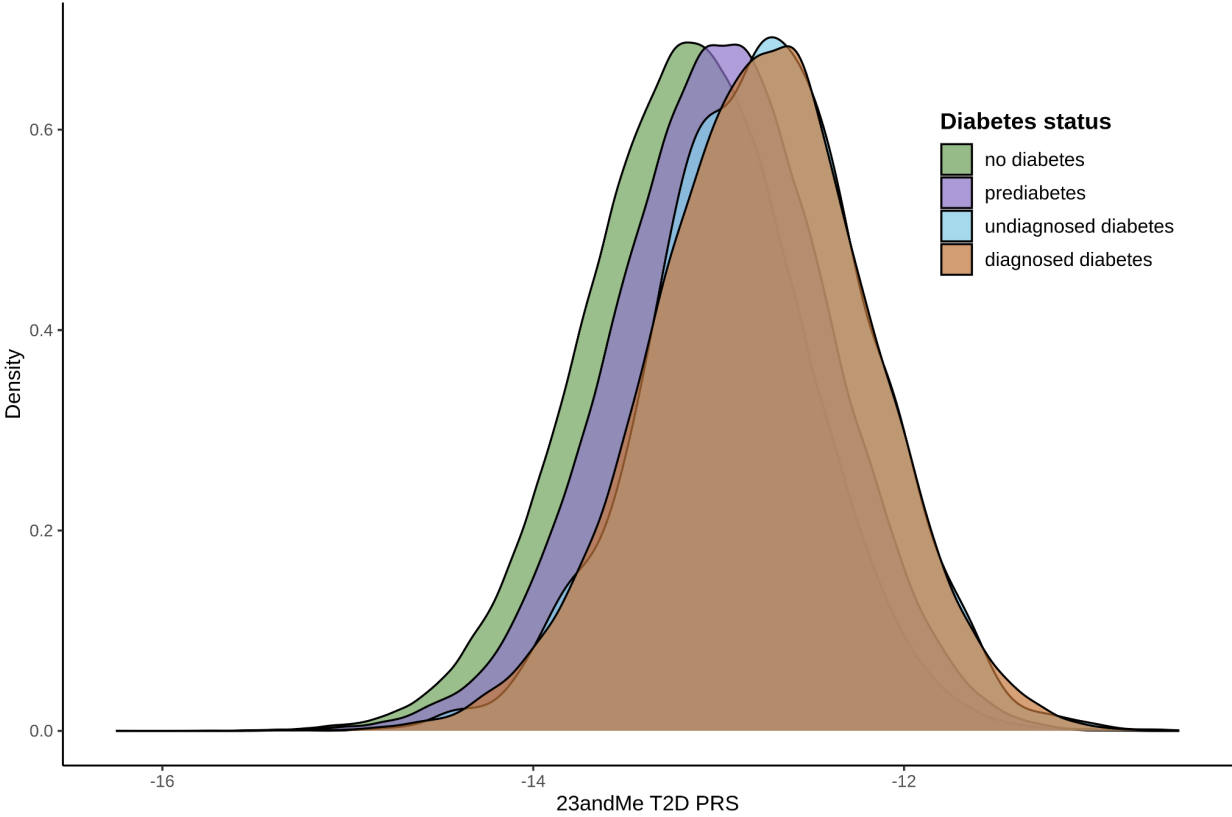

**Figure S8. Plot of the empirical cumulative distribution function (eCDF) of HbA1c among individuals without doctor-diagnosed diabetes at study baseline.** The blue dashed line indicates the threshold for prediabetes levels and the red dashed line indicates the threshold for diabetes.

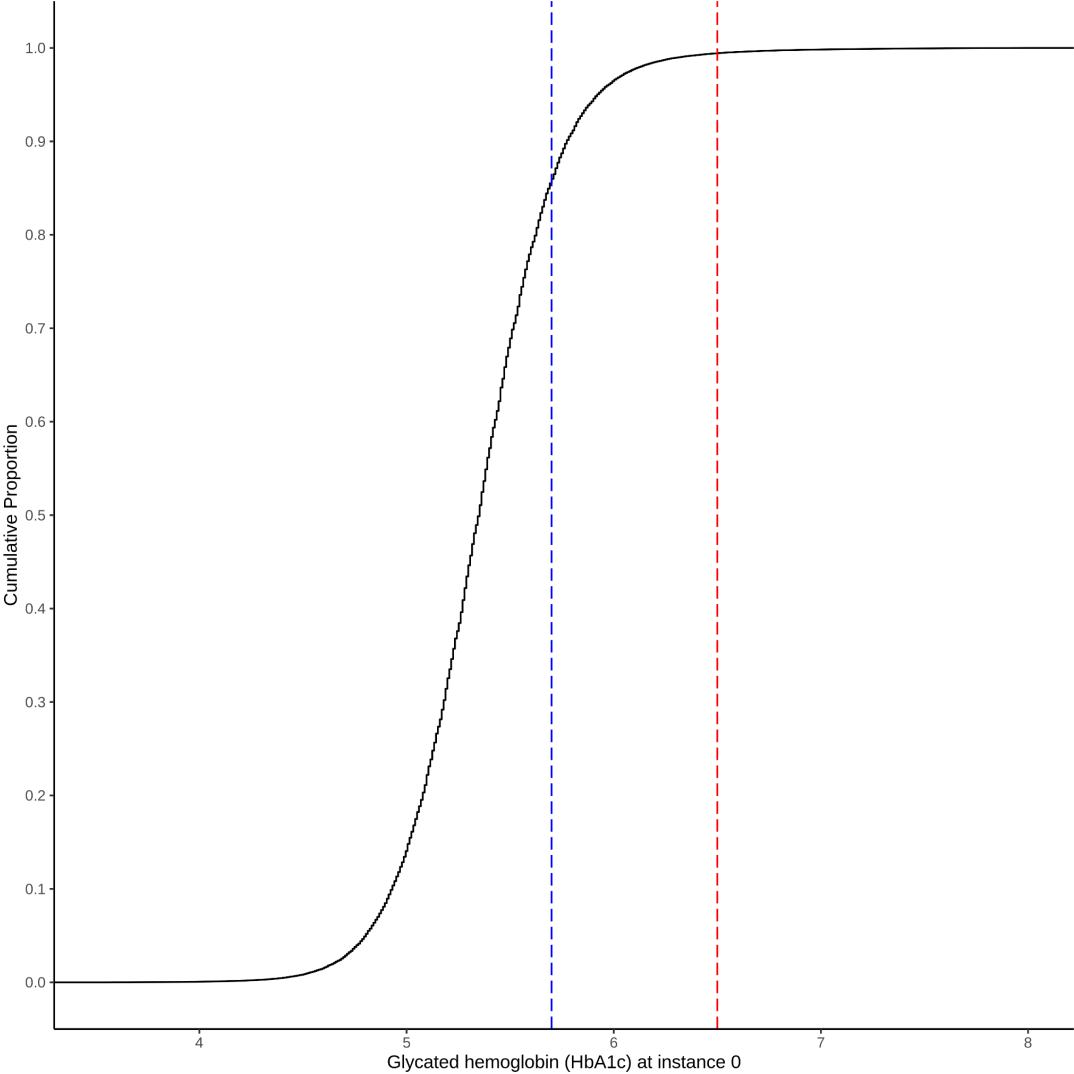

**Table S1. Data field definitions.** Definitions of data fields used from the first occurrence data (UK Biobank Category 1712).

| Data field ID | Data field concept                                                |
|---------------|-------------------------------------------------------------------|
| 130706        | Date E10 first reported (insulin-dependent diabetes mellitus)     |
| 130707        | Source of report of E10 (insulin-dependent diabetes mellitus)     |
| 130708        | Date E11 first reported (non-insulin-dependent diabetes mellitus) |
| 130709        | Source of report of E11 (non-insulin-dependent diabetes mellitus) |
| 130710        | Date E12 first reported (malnutrition-related diabetes mellitus)  |
| 130711        | Source of report of E12 (malnutrition-related diabetes mellitus)  |
| 130712        | Date E13 first reported (other specified diabetes mellitus)       |
| 130713        | Source of report of E13 (other specified diabetes mellitus)       |
| 130714        | Date E14 first reported (unspecified diabetes mellitus)           |
| 130715        | Source of report of E14 (unspecified diabetes mellitus)           |

Footnote: E10-E14 refer to ICD-10 codes (defined in the brackets)

**Table S2. Additive effect of T2D PRS in addition to overweight/obesity to identify individuals with undiagnosed diabetes.** Analyses were restricted to individuals who self-report an absence of doctor diagnosed diabetes and who have an HbA1c measurement, both at baseline.

| BMI                   | T2D PRS | Undiagnosed diabetes (% total undiagnosed) |
|-----------------------|---------|--------------------------------------------|
| ≥25 kg/m <sup>2</sup> | -       | 93%                                        |
| ≥25 kg/m <sup>2</sup> | Top 5%  | 94%                                        |
| ≥25 kg/m <sup>2</sup> | Top 14% | 95%                                        |
| ≥25 kg/m <sup>2</sup> | Top 26% | 96%                                        |
| ≥25 kg/m <sup>2</sup> | Top 41% | 97%                                        |
| ≥25 kg/m <sup>2</sup> | Top 54% | 98%                                        |
| ≥25 kg/m <sup>2</sup> | Top 69% | 99%                                        |

**Table S3. Comparison of measured BMI and a T2D PRS at detecting undiagnosed diabetes when normalized to the same number of individuals that have a BMI ≥25kg/m<sup>2</sup>.** Analyses were restricted to individuals who self-report an absence of doctor diagnosed diabetes and who have an HbA1c measurement, both at baseline

|                                                 | BMI ≥25kg/m <sup>2</sup> (BMI in the top 65.6%) | T2D PRS in the top 65.6% |
|-------------------------------------------------|-------------------------------------------------|--------------------------|
| Number with HbA1c ≥ 6.5% at instance 0          | 2,735                                           | 2,504                    |
| Number with HbA1c < 6.5% at instance 0          | 267,758                                         | 267,989                  |
| Detection rate (%)                              | 1.01                                            | 0.93%                    |
| Proportion (%) of undiagnosed diabetes detected | 93.2%                                           | 85.3%                    |
